# Supplementary material for: iRGD-engineered exosomes mediate siMYC delivery for effective tumor suppression in triple-negative breast cancer
Source: Royal Society of Chemistry journal article supplement (doi:10.1039/d5nr04841a), 2025-12-12

**Figure 1A**

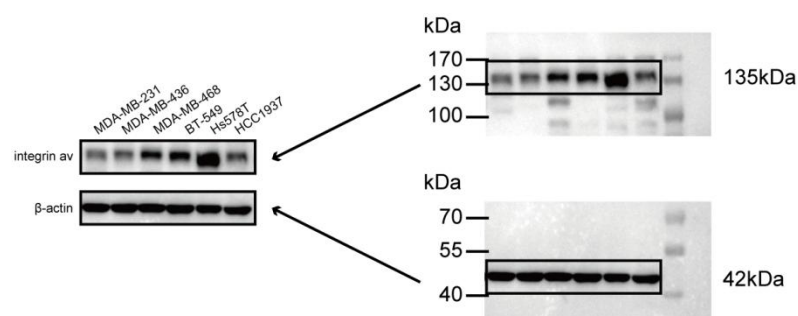

**Figure 1C**

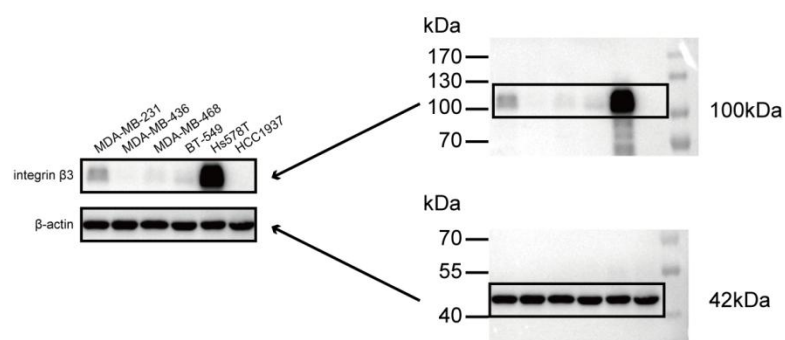

**Figure 1E**

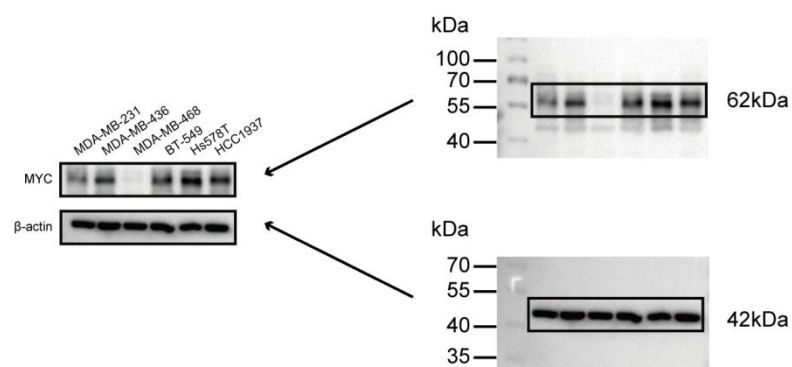

**Figure 1G**

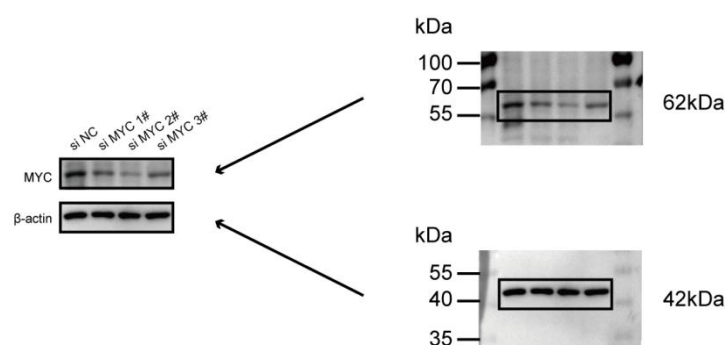

**Figure 2A left panel**

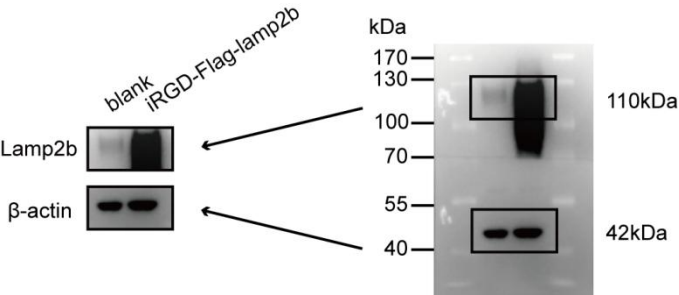

**Figure 2A right panel**

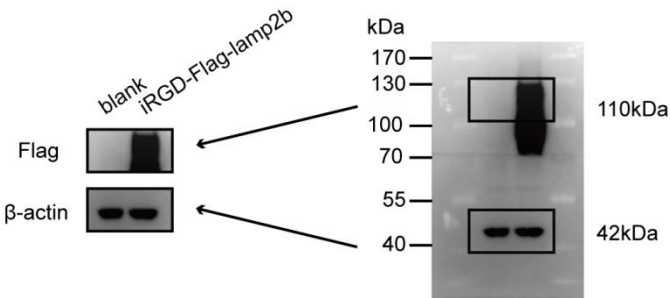

**Figure 2B**

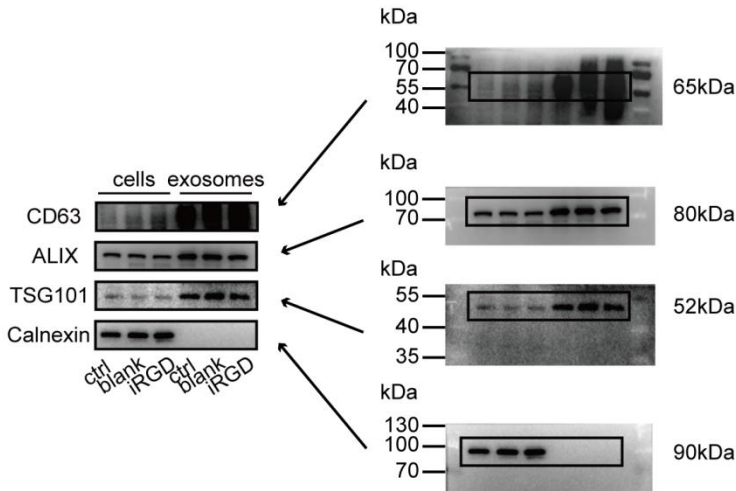

**Figure 4E**

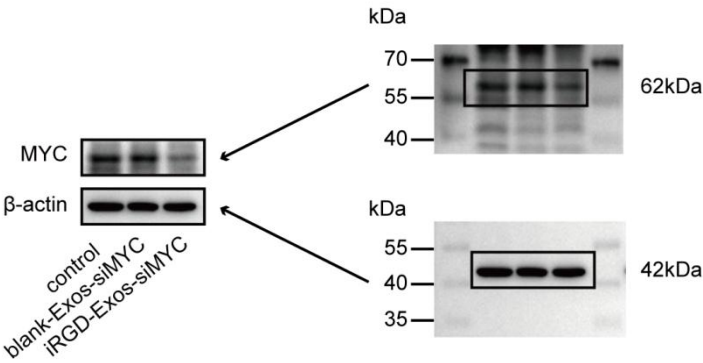

Figure 5A

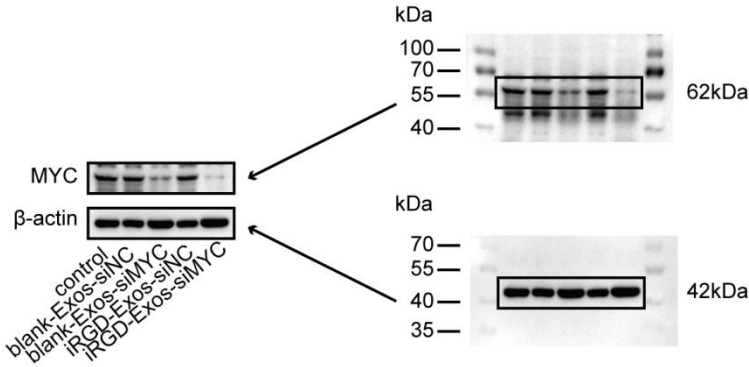

Figure 6E left panel

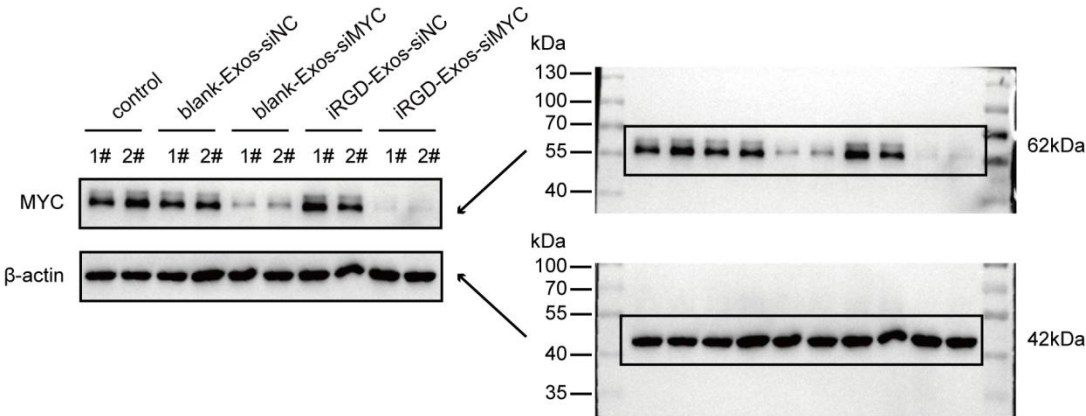

Figure 6E middle panel

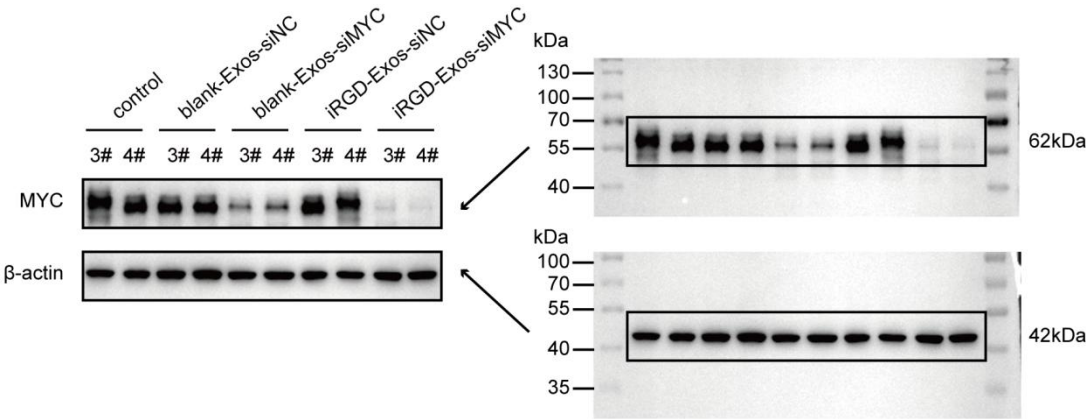

**Figure 6E right panel**

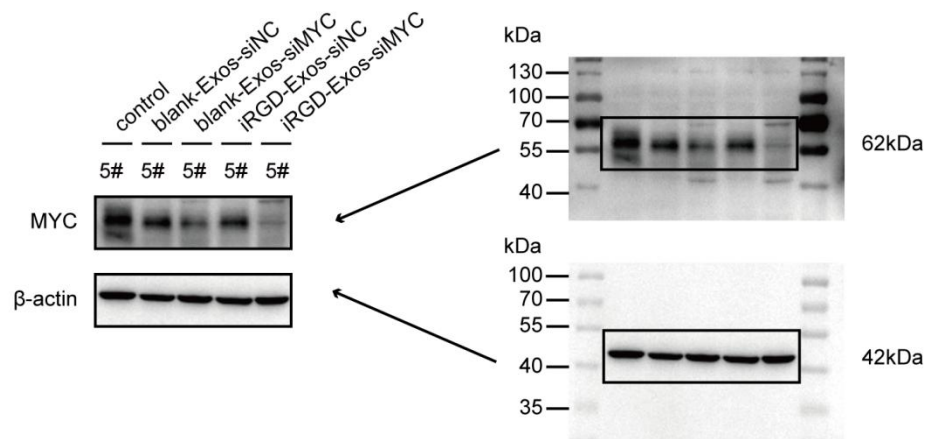

**Supplementary Figure S1A**

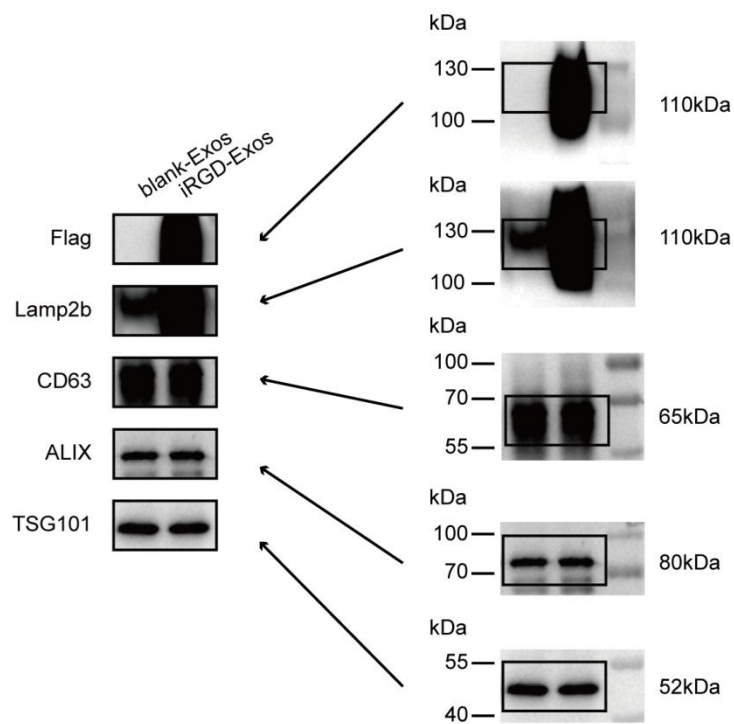

Supplement: d5nr04841a1.pdf [file d5nr04841a1.pdf]
