# Supplementary material for: iRGD-engineered exosomes mediate siMYC delivery for effective tumor suppression in triple-negative breast cancer
Source: Royal Society of Chemistry journal article supplement (doi:10.1039/d5nr04841a), 2025-12-12
Supplement: d5nr04841a2.pdf [file d5nr04841a2.pdf]

## Supplementary Figure S1

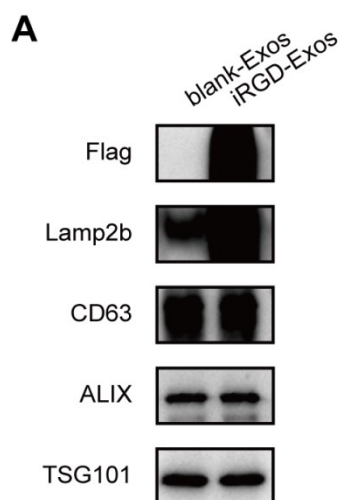

### Supplementary Figure S1 Western blot analysis of iRGD-modified exosomes.

(A) Western blot showing the expression of iRGD-related proteins (Flag, Lamp2b) and exosomal markers (CD63, ALIX, TSG101) in blank-Exos and iRGD-Exos. CD63, ALIX, and TSG101 also served as internal reference proteins.

## Supplementary Figure S2

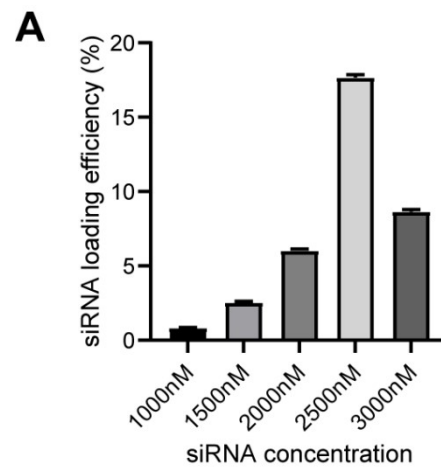

### Supplementary Figure S2 siRNA loading efficiency.

(A) siRNA loading efficiency of exosomes at different siRNA concentrations (1000–3000 nM) was determined by qRT-PCR.

## Supplementary Figure S3

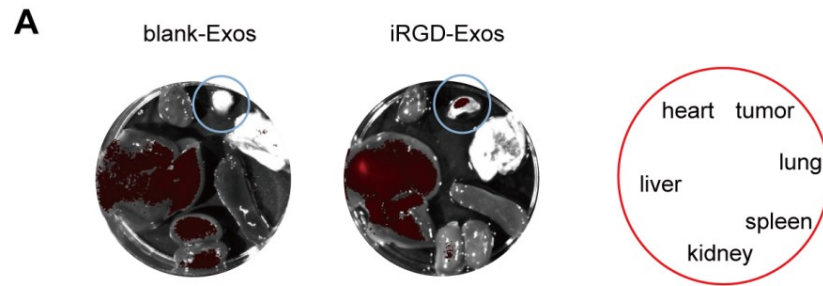

### Supplementary Figure S3 Targeting of iRGD-Exos in vivo.

(A) Fluorescence imaging of tumors and major organs from Hs578T tumor-bearing nude mice 24 hours after tail vein injection of Dil-labeled blank-Exos/iRGD-Exos. The blue circle marks the tumor site.

## Supplementary Figure S4

**A**

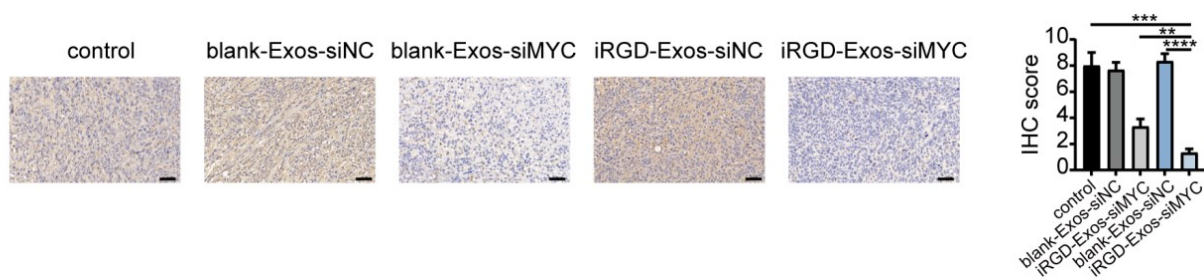

### Supplementary Figure S4 IHC analysis of MYC expression in animal models.

(A) Representative images and quantification of MYC expression in the tumor by IHC. Scale bar: 50  $\mu$ m. Data are presented as mean  $\pm$  SD. \*  $P < 0.05$ , \*\*  $P < 0.01$ , \*\*\*  $P < 0.001$  and \*\*\*\*  $P < 0.0001$ . IHC, immunohistochemical.

## Supplementary Figure S5

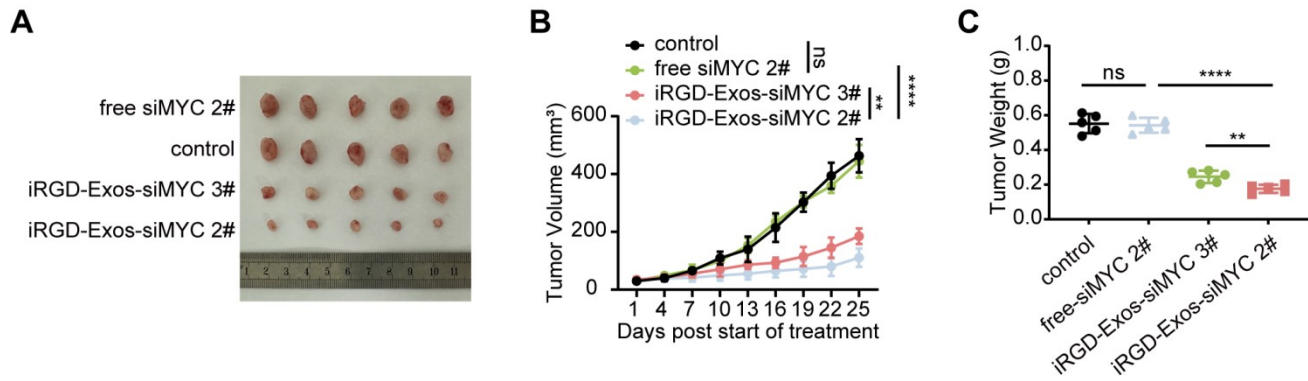

**Supplementary Figure S5 Comparison of tumor growth inhibition between free siMYC and iRGD-Exos-siMYC in TNBC xenograft mice.**

(A) Representative images of excised tumors from each treatment group. (B) Tumor growth curves over time. (C) Final tumor weights at the end of treatment. Data are presented as mean  $\pm$  SD. \*  $P < 0.05$ , \*\*  $P < 0.01$ , \*\*\*  $P < 0.001$  and \*\*\*\*  $P < 0.0001$ . ns, not significant; TNBC, triple-negative breast cancer.

## Supplementary Figure S6

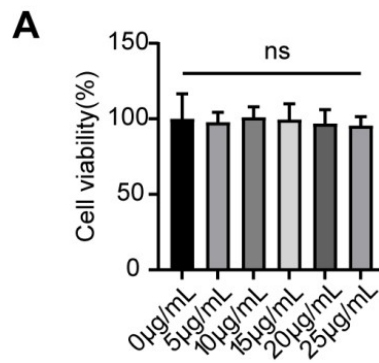

### Supplementary Figure S6 In vitro safety evaluation.

(A) Viability of Hs578T cells treated with different concentrations of iRGD-Exos (0–25 µg/mL) for 48 h.
